# Supplementary material
Source: PubMed Central journal article supplement (PMC8428628)
Supplement: NIHMS1737599-supplement-1.pdf [file NIHMS1737599-supplement-1.pdf]

SUPPLEMENTAL MATERIAL

Supplemental Table 1. Summary of genes sequenced for 65 individuals with gene panel testing

|              |       |               |             |              |
|--------------|-------|---------------|-------------|--------------|
| ABCC9        | EMD   | MTTH          | <i>MYH7</i> | SGCD         |
| <i>ACTC1</i> | GLA   | MTTI          | MYL2        | TAZ          |
| ACTN2        | LAMP2 | MTTK          | MYL3        | TCAP         |
| ANKRD1       | LDB3  | MTTL1         | MYPN        | TNNC1        |
| BAG3         | LMNA  | MTTL2         | NEBL        | <i>TNNI3</i> |
| CAV3         | MTND1 | MTTM          | NEXN        | <i>TNNT2</i> |
| CRYAB        | MTND5 | MTTQ          | PLN         | <i>TPM1</i>  |
| CSRP3        | MTND6 | MTTS1         | PRKAG2      | TTN          |
| CTF1         | MTTD  | MTTS2         | RBM20       | TTR          |
| <i>DES</i>   | MTTG  | <i>MYBPC3</i> | SCN5A       | VCL          |

65 individuals had CM gene panel testing from one of four clinical testing laboratories. Gene panel size ranged from 11-38 genes. All individuals had sequencing of at least the 6 genes in italics. 52 (80%) individuals had sequencing of at least the 27 genes in gray.

Supplemental Table 2. Genetic conditions and test results in 12 individuals with LVNC

| <b>Genetic Diagnostic Category</b> | <b>Cardiac Phenotype</b> | <b>Genetic Diagnosis</b> | <b>Genetic Testing Results</b>                             |
|------------------------------------|--------------------------|--------------------------|------------------------------------------------------------|
| Mitochondrial                      | LVNC/CM                  | Mitochondrial            | m.8528T>C, homoplasmic                                     |
| Mitochondrial                      | iLVNC                    | Unknown                  | Non-diagnostic                                             |
| Mitochondrial                      | LVNC/CM                  | Unknown                  | Non-diagnostic                                             |
| Mitochondrial                      | LVNC/CM                  | Mitochondrial            | m.5814T>C, homoplasmic                                     |
| Chromosomal                        | iLVNC                    | Chromosomal              | Unbalanced translocation, 46,XX,der(13)t(7;13)(q33;q33.1)  |
| Chromosomal                        | iLVNC                    | 1p36 deletion syndrome   | 6.5 Mb deletion, 1p36.33p36.31                             |
| Chromosomal                        | iLVNC                    | Chromosomal              | Tetrasomy, 5q32.2-5q35.3                                   |
| Syndromic/mitochondrial            | LVNC/CM                  | Barth syndrome           | <i>TAZ</i> , deletion of exons 1-5                         |
| Syndromic                          | LVNC/CVM                 | Noonan syndrome          | Non-diagnostic                                             |
| Syndromic                          | LVNC/CVM                 | Noonan syndrome          | Non-diagnostic                                             |
| Syndromic                          | LVNC/CVM                 | Noonan syndrome          | <i>PTPN11</i> , p.Asn58Lys, c.174C>A, heterozygous         |
| Syndromic                          | LVNC/CM                  | Malonic acidemia         | <i>MLYCD</i> , p.Leu133AlafsX72, c.393_400del8, homozygous |
